# Supplementary material for: Label Accuracy of Weight Loss Dietary Supplements Marketed Online With Military Discounts
Source: PubMed Central journal article supplement (PMC11063798; doi:10.1001/jamanetworkopen.2024.9131), 2024-05-01
Supplement: jamanetwopen-e249131-s002.pdf [file jamanetwopen-e249131-s002.pdf]

## Data Sharing Statement

Crawford. Label Accuracy of Weight Loss Dietary Supplements Marketed Online With Military Discounts. *JAMA Netw Open*. Published May 01, 2024.

doi:10.1001/jamanetworkopen.2024.9131

### Data

**Data available:** Yes

**Data types:** Data (not involving human participants)

**How to access data:** [cindy.crawford.ctr@usuhs.edu](mailto:cindy.crawford.ctr@usuhs.edu)

**When available:** With publication

### Supporting Documents

**Document types:** None

### Additional Information

**Who can access the data:** Anyone requesting the data

**Types of analyses:** for any purpose

**Mechanisms of data availability:** with a signed data access agreement

**Any additional restrictions:** Data are kept within an Excel worksheet and can be shared; not relevant to this study
